# Supplementary material for: Efficient water oxidation with amorphous transition metal boride catalysts synthesized by chemical reduction of metal nitrate salts at room temperature
Source: Royal Society of Chemistry journal article supplement (doi:10.1039/c7ra02558k), 2017-01-01
Supplement: c7ra02558k1.pdf [file c7ra02558k1.pdf]

## Supporting Information

### Efficient water oxidation with amorphous transition metal boride catalysts synthesized by chemical reduction of metal nitrate salts at room temperature

Yisu Yang, † Linzhou Zhuang, † Thomas E. Rufford, Shaobin Wang, Zhonghua Zhu\*  
z.zhu@uq.edu.au; Fax: +61 733654199; Tel: +61 733653528

Author Contributions:

†These authors contributed equally.

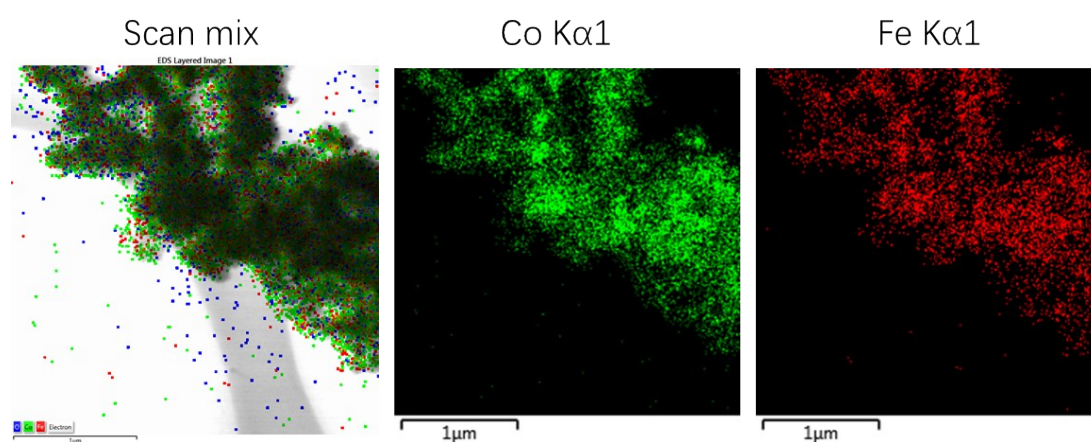

Figure S1. Energy dispersive x-ray spectroscopy of the sample Co<sub>3</sub>Fe<sub>1</sub>-AMOR.

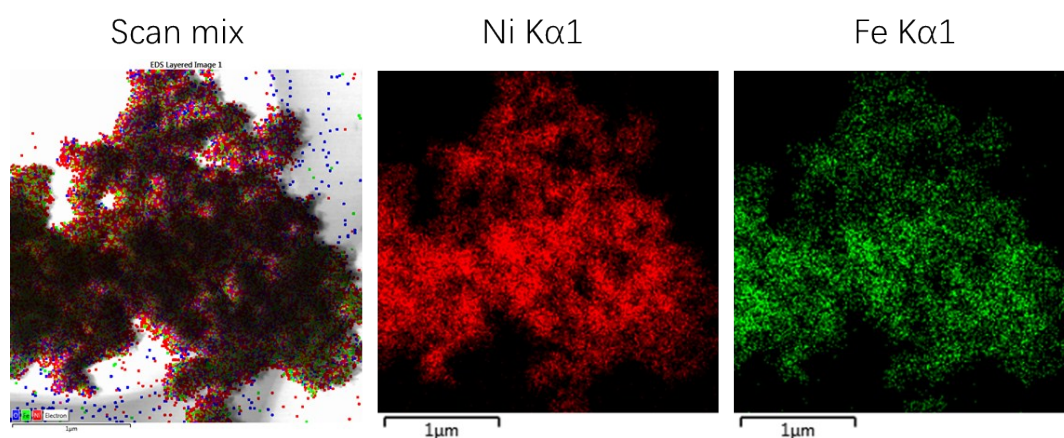

Figure S2. Energy dispersive x-ray spectroscopy of the sample Ni<sub>3</sub>Fe<sub>1</sub>-AMOR.

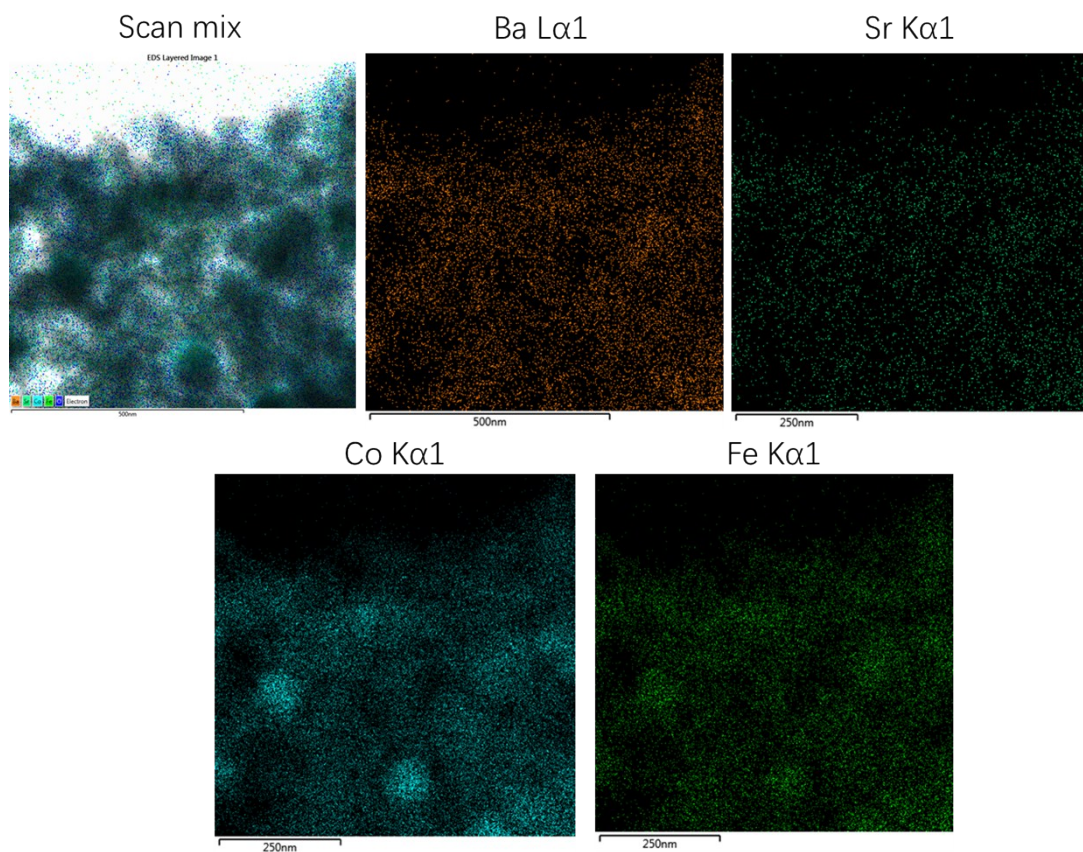

Figure S3. Energy dispersive x-ray spectroscopy of the sample Ba<sub>5</sub>Sr<sub>5</sub>Co<sub>8</sub>Fe<sub>2</sub>-AMOR.

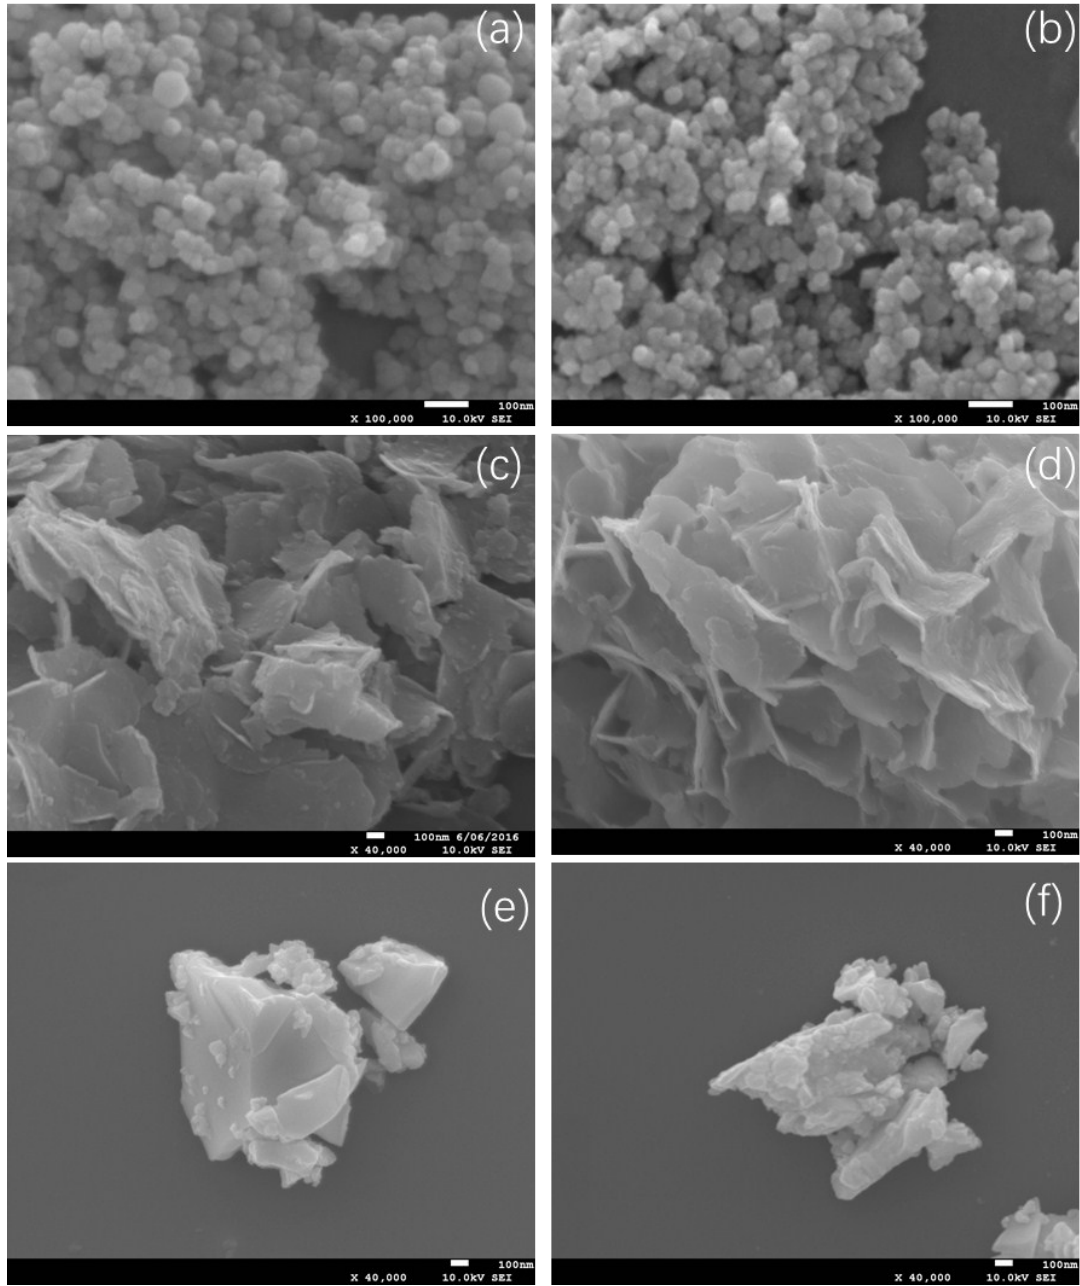

Figure S4. SEM images of the crystalline samples: Co1Fe2-SPIN (a), Ni1Fe2-SPIN (b), Co3Fe1-LDH (c), Ni3Fe1-LDH (d), Ba5Sr5Co8Fe2-PERO (e) and La6Sr4Co2Fe8-PERO (f). All scale bars are 100 nm.

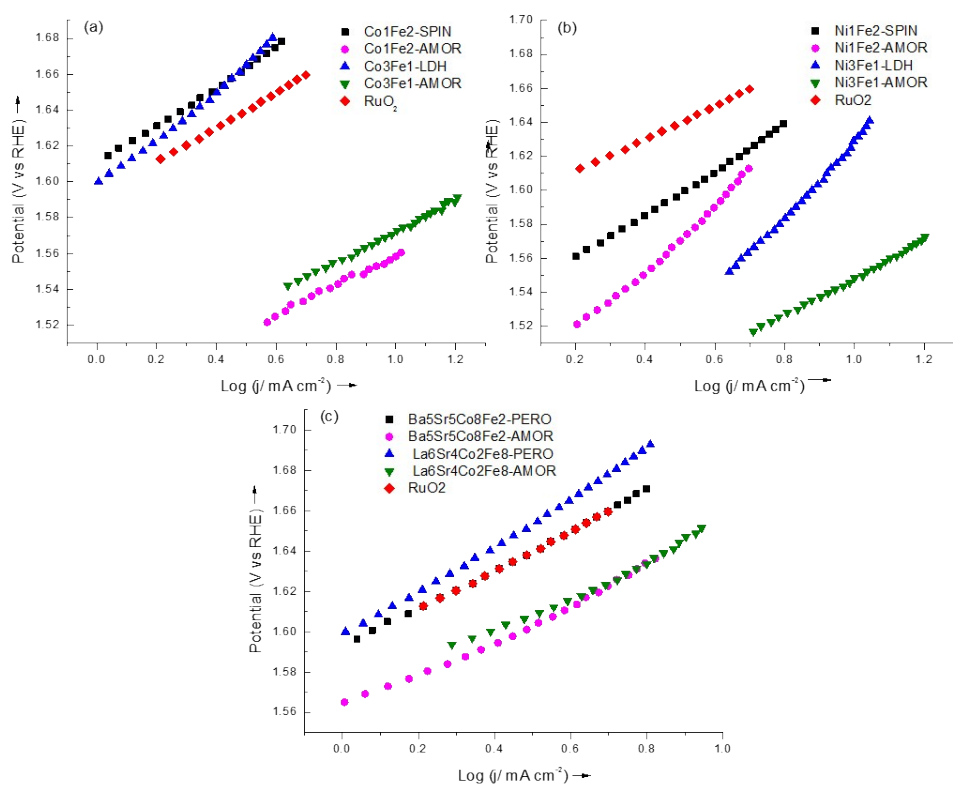

Figure S5. Comparison of the Tafel slopes of the amorphous catalysts and the corresponding crystalline metal oxides: Co-Fe binary catalysts (a), Ni-Fe binary catalysts (b) and quaternary catalysts (c).

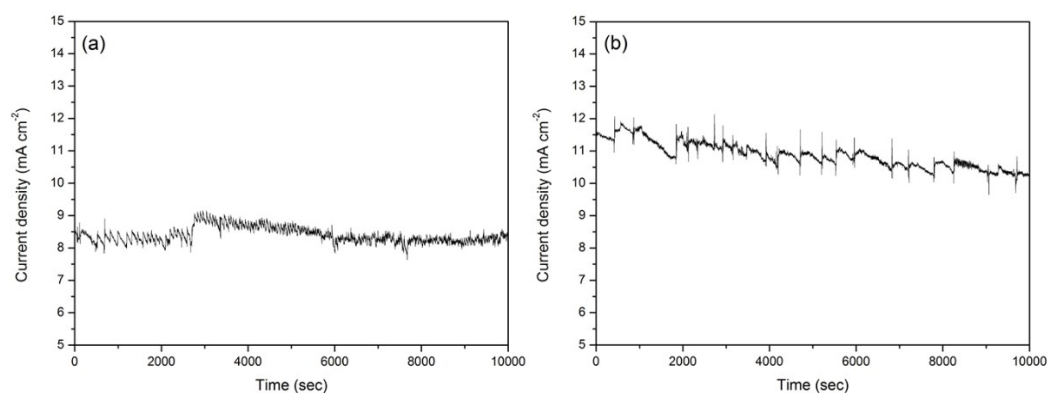

Figure S6. 10000 sec stability test of sample Co1Fe2-AMOR (a) and Ni3Fe1-AMOR (b) at an overpotential of 0.7 V vs Ag|AgCl in 0.1 M KOH solution.
